# Supplementary material
Source: Springer Nature journal article supplement (https://www.springermedizin.de/resource/supplementary/12884_2008_177_MOESM14_ESM.pdf/9459788)
Supplement: MOESM14 [file 9459788]

# Index Test

# Study Details

# Likelihood ratio of positive test (95% CI)

# Likelihood ratio of negative test (95% CI)

| Threshold                                    | No of studies | No of women |
|----------------------------------------------|---------------|-------------|
| <i>Irhbin A &gt; 95<sup>th</sup> centile</i> | 1             | 759         |
| <i>Irhbin A &gt; mean + 2sd</i>              | 1             | 61          |
| <i>Irhbin A &gt; 3.0 MbM</i>                 | 1             | 640         |
| <i>Irhbin A &gt; 2.79 MbM</i>                | 1             | 178         |
| <i>Irhbin A &gt; 2.5 MbM</i>                 | 1             | 640         |
| <i>Irhbin A &gt; 2.2 MbM</i>                 | 1             | 640         |
| <i>Irhbin A &gt; 2.0 MbM</i>                 | 2             | 33,785      |
| <i>Irhbin A &gt; 1.8 MbM</i>                 | 1             | 58          |
| <i>Irhbin A &gt; 1.5 MbM</i>                 | 1             | 640         |
| <i>Irhbin A &gt; 1.3 MbM</i>                 | 1             | 640         |
| <i>Irhbin A &gt; 1.2 MbM</i>                 | 1             | 640         |
| <i>Irhbin A &gt; 1.1 MbM</i>                 | 1             | 640         |
| <i>Irhbin A &gt; 1.0 MbM</i>                 | 1             | 640         |
| <i>Irhbin A &gt; 0.9 MbM</i>                 | 1             | 640         |
| <i>Irhbin A &gt; 0.8 MbM</i>                 | 1             | 640         |
| <i>Irhbin A &gt; 0.6 MbM</i>                 | 1             | 640         |
| <i>Irhbin A &gt; 0.5 MbM</i>                 | 1             | 640         |
| Threshold                                    | No of studies | No of women |
| <i>Irhbin A &gt; 2.2 MbM</i>                 | 1             | 640         |
| Threshold                                    | No of studies | No of women |
| <i>Irhbin A &gt; 2.0 MbM</i>                 | 1             | 33,145      |
| Threshold                                    | No of studies | No of women |
| <i>Irhbin A &gt; 2.0 MbM</i>                 | 1             | 33,145      |

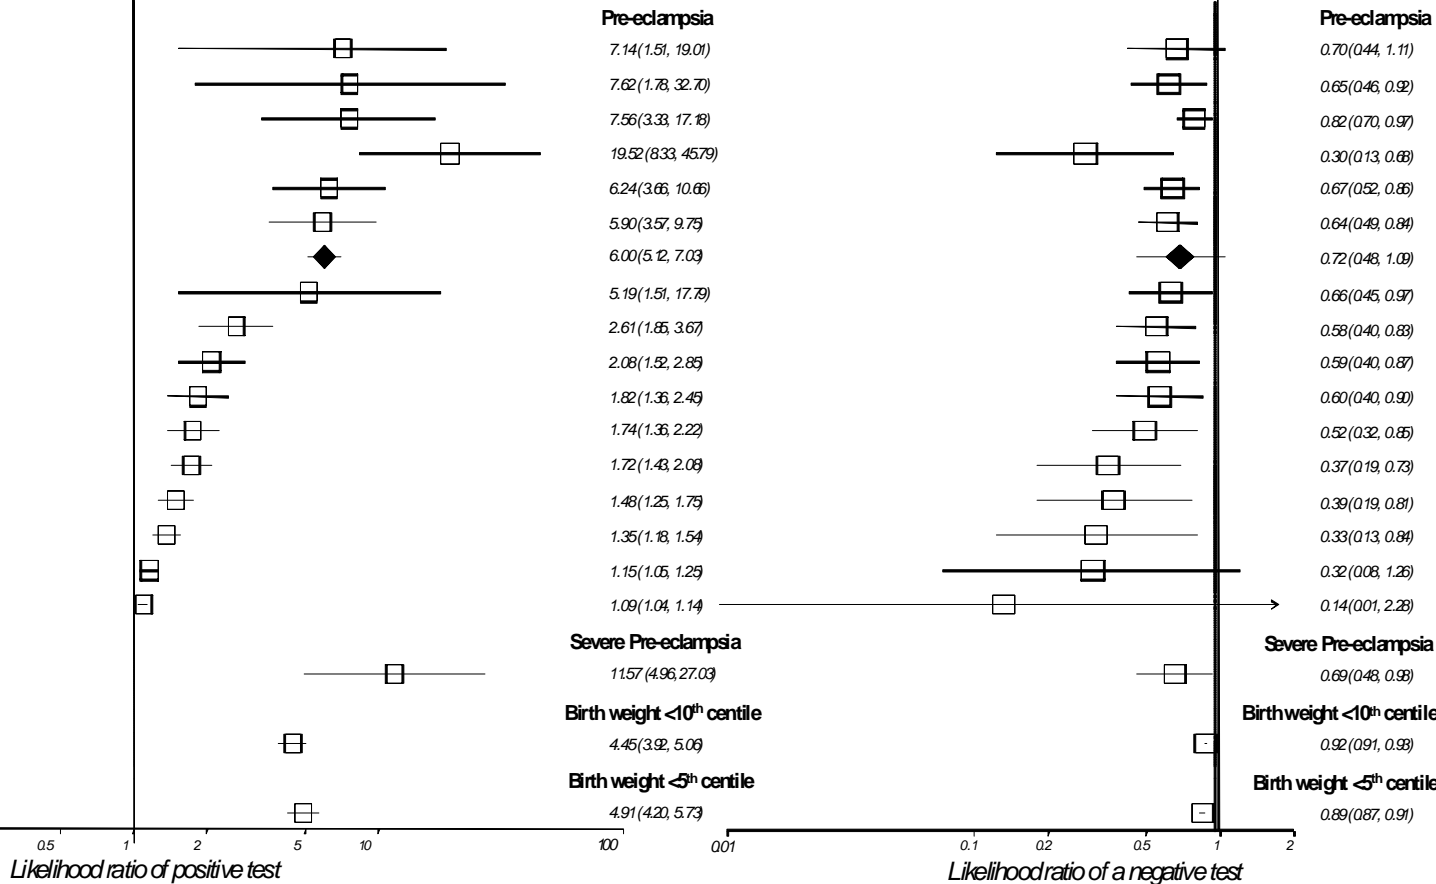

0.01 0.1 0.2 0.5 1 2 5 10 100 0.01 0.1 0.2 0.5 1 2

Likelihood ratio of positive test Likelihood ratio of a negative test
